# Supplementary material for: Knock-down of odr-3 and ife-2 additively extends lifespan and healthspan in C. elegans
Source: Aging (Albany NY). 2021 Sep 9;13(17):21040–65. doi: 10.18632/aging.203518 (PMC8457566; doi:10.18632/aging.203518)
Supplement: Supplementary Table 1 [file aging-13-203518-s002.xlsx]

## Sheet: Supplementary Table 1
Supplementary Table 1. Mean, median and maximum lifespan of all worm populations assayed.
Strain	Mutation / intervention*	Total number of animals	Number of experiments	Experimental conditions	Mean lifespan			Median lifespan		Maximum lifespan		Control	p-value**
					Number of days	SEM	Change** (%)	Number of days	Change** (%)	Number of days	Change** (%)
WT(EV)	-	255	3	HT115, FUdR, EV	20.6	0.197	[control]	20	[control]	29	[control]	-	-
odr-3	n1605	255	3	HT115, FUdR, EV	26	0.334	26.2136	26	30	33	13.7931	WT(EV)	< 2.0E-16
ife-2	RNAi	255	3	HT115, FUdR, RNAi	24.3	0.24	17.9612	24	20	35	20.6897	WT(EV)	< 2.0E-16
ife-2;EV	RNAi / 2	255	3	HT115, FUdR, RNAi	22.9	0.259	11.165	22	10	33	13.7931	WT(EV)	1e-10
odr-3;ife-2	n1605; RNAi	255	3	HT115, FUdR, RNAi	28.9	0.412	40.2913	29	45	39	34.4828	WT(EV)	< 2.0E-16
odr-3;ife-2;EV	n1605; RNAi / 2	255	3	HT115, FUdR, RNAi	30.1	0.464	46.1165	30	50	40	37.931	WT(EV)	< 2.0E-16
cku-70	RNAi	255	3	HT115, FUdR, RNAi	21.5	0.216	4.36893	21	5	27	-6.89655	WT(EV)	0.007
cku-70;EV	RNAi / 2	255	3	HT115, FUdR, RNAi	21.9	0.198	6.31068	22	10	27	-6.89655	WT(EV)	0.0001
odr-3;cku-70	n1605; RNAi	255	3	HT115, FUdR, RNAi	23.4	0.468	13.5922	23	15	35	20.6897	WT(EV)	4e-11
odr-3;cku-70;EV	n1605; RNAi / 2	255	3	HT115, FUdR, RNAi	26.5	0.366	28.6408	27	35	34	17.2414	WT(EV)	< 2.0E-16
ife-2;cku-70	RNAi / 2; RNAi / 2	255	3	HT115, FUdR, RNAi	23.7	0.254	15.0485	24	20	34	17.2414	WT(EV)	3e-16
odr-3;ife-2;cku-70	n1605; RNAi / 2; RNAi / 2	255	3	HT115, FUdR, RNAi	27.9	0.33	35.4369	28	40	39	34.4828	WT(EV)	< 2.0E-16
WT(EV)	-	170	2	HT115, FUdR, EV	19	0.155	[for reference]	19	[for reference]	24	[for reference]	-	-
daf-16 - control	mu86	170	2	HT115, FUdR, EV	16.4	0.215	[control]	16	[control]	22	[control]	WT(EV)	7e-14
daf-16;odr-3	mu86; n1605	170	2	HT115, FUdR, EV	14	0.221	-14.6341	14	-12.5	20	-9.09091	daf-16	5e-12
daf-16;ife-2	mu86; RNAi	170	2	HT115, FUdR, RNAi	18	0.262	9.7561	18	12.5	23	4.54545	daf-16	1e-06
daf-16;odr-3;ife-2	mu86; n1605; RNAi	170	2	HT115, FUdR, RNAi	16	0.261	-2.43902	16	0	21	-4.54545	daf-16	NS
daf-16;cku-70	mu86; RNAi	170	2	HT115, FUdR, RNAi	16.5	0.174	0.609756	17	6.25	22	0	daf-16	NS
daf-16;odr-3;cku-70	mu86; n1605; RNAi	170	2	HT115, FUdR, RNAi	13.9	0.23	-15.2439	13	-18.75	20	-9.09091	daf-16	2e-12
daf-16;ife-2;cku-70	mu86; RNAi / 2; RNAi / 2	170	2	HT115, FUdR, RNAi	18.4	0.214	12.1951	19	18.75	23	4.54545	daf-16	4e-10
daf-16;odr-3;ife-2;cku-70	mu86; n1605; RNAi / 2; RNAi / 2	170	2	HT115, FUdR, RNAi	16.7	0.233	1.82927	16	0	22	0	daf-16	NS
WT	-	255	3	OP50, FUdR	19.9	0.2	-	20	-	28	-	-	-
odr-3	n1605	255	3	OP50, FUdR	21.4	0.3	7.5	21	5	30	7.1	WT	0.0001
ife-2	ok306	255	3	OP50, FUdR	20.8	0.3	4.5	20	0	30	7.1	WT	0.01
odr-3;ife-2	n1605; ok306	255	3	OP50, FUdR	22.6	0.4	13.6	22	10	38	35.7	WT	7e-10
daf-16	mu86	255	3	OP50, FUdR	15.8	0.2	-20.6	16	-20	24	-14.3	WT	<2E-16
daf-16;odr-3	mu86; n1605	255	3	OP50, FUdR	15.2	0.2	-3.8	15	-6.25	22	-8.3	daf-16	NS
daf-16;ife-2	mu86; ok306	255	3	OP50, FUdR	17	0.2	7.6	17	6.25	26	8.3	daf-16	1e-05
daf-16;odr-3;ife-2	mu86; n1605; ok306	255	3	OP50, FUdR	15.2	0.2	-3.8	16	0	23	-4.2	daf-16	NS
WT		255	3	OP50, no FUdR	24.4	0.3	-	25	-	34	-	-	-
odr-3	n1605	255	3	OP50, no FUdR	26.4	0.4	8.2	26	4	41	20.6	WT	9e-05
ife-2	ok306	255	3	OP50, no FUdR	26.5	0.3	8.6	27	8	38	11.8	WT	9e-05
odr-3;ife-2	n1605; ok306	255	3	OP50, no FUdR	27.9	0.4	14.3	28	12	40	17.6	WT	5e-11
* RNAi / 2 represents a 1:1 density mixture of ife-2 or cku-70 RNAi clone and HT115 (EV) bacteria
** Computed against the specific control population mentioned in the table
