# Supplementary material for: Knock-down of odr-3 and ife-2 additively extends lifespan and healthspan in C. elegans
Source: Aging (Albany NY). 2021 Sep 9;13(17):21040–65. doi: 10.18632/aging.203518 (PMC8457566; doi:10.18632/aging.203518)
Supplement: Supplementary Table 2 [file aging-13-203518-s003.xlsx]

## Sheet: Supplementary Table 2
Supplementary Table 2. Mean, median and maximum number of days associated with each motility state.
Strain	Mutation / intervention*	Experimental conditions	Average time in state A (days) [state A fraction]	Relative change (vs. control)	Change in state A fraction (vs. control)	Average time in mobile and impaired states** (days)	Average lifespan (days)	Median time in mobile state (days)	Median time in mobile and impaired states** (days)	Median lifespan (days)	Maximum time in mobile state (days)	Maximum time in mobile and impaired states** (days)	Maximum lifespan (days)
WT(EV)	-	HT115, FUdR, EV	17.3±0.2 [84%]	[control]	[control]	18.8±0.2 [91.2%]	20.6±0.2	17 [85%]	18 [90%]	20	25 [86.2%]	27 [93.1%]	29
odr-3	n1605	HT115, FUdR, EV	20.8±0.3 [80%]	0.2023	-0.047619	23.4±0.3 [90.0%]	26.0±0.3	21 [80.8%]	24 [92.3%]	26	28 [84.8%]	31 [93.9%]	33
ife-2	RNAi	HT115, FUdR, RNAi	21.0±0.2 [86.4%]	0.2138	0.0285714	22.6±0.2 [93.0%]	24.3±0.2	21 [87.5%]	23 [95.8%]	24	27 [77.1%]	30 [85.7%]	35
ife-2;EV	RNAi / 2	HT115, FUdR, RNAi	19.7±0.2 [86%]	0.1387	0.0238095	21.1±0.2 [92.1%]	22.9±0.3	19 [86.4%]	21 [95.5%]	22	25 [75.8%]	27 [81.8%]	33
odr-3;ife-2	n1605; RNAi	HT115, FUdR, RNAi	25.0±0.4 [86.5%]	0.445	0.0297619	27.2±0.4 [94.1%]	28.9±0.4	24 [82.8%]	28 [96.6%]	29	35 [89.7%]	38 [97.4%]	39
odr-3;ife-2;EV	n1605; RNAi / 2	HT115, FUdR, RNAi	25.6±0.4 [85%]	0.4797	0.0119048	28.4±0.5 [94.3%]	30.1±0.5	25 [83.3%]	29 [96.7%]	30	35 [87.5%]	37 [92.5%]	40
cku-70	RNAi	HT115, FUdR, RNAi	17.0±0.2 [79.1%]	-0.0173	-0.0583333	19.3±0.2 [89.7%]	21.5±0.2	17 [81%]	19 [90.5%]	21	22 [81.5%]	25 [92.6%]	27
cku-70;EV	RNAi / 2	HT115, FUdR, RNAi	17.6±0.1 [80.4%]	0.0173	-0.0428571	19.8±0.2 [90.4%]	21.9±0.2	17 [77.3%]	20 [90.9%]	22	22 [81.5%]	25 [92.6%]	27
odr-3;cku-70	n1605; RNAi	HT115, FUdR, RNAi	19.7±0.4 [84.2%]	0.1387	0.00238095	21.5±0.4 [91.8%]	23.4±0.5	20 [87%]	22 [95.7%]	23	30 [85.7%]	31 [88.6%]	35
odr-3;cku-70;EV	n1605; RNAi / 2	HT115, FUdR, RNAi	21.3±0.3 [80.4%]	0.2312	-0.0428571	23.9±0.4 [90.1%]	26.5±0.4	22 [81.5%]	24 [88.9%]	27	27 [79.4%]	31 [91.2%]	34
ife-2;cku-70	RNAi / 2; RNAi / 2	HT115, FUdR, RNAi	20.0±0.2 [84.4%]	0.156	0.0047619	21.6±0.2 [91.1%]	23.7±0.3	19 [79.2%]	21 [87.5%]	24	26 [76.5%]	27 [79.4%]	34
odr-3;ife-2;cku-70	n1605; RNAi / 2; RNAi /2	HT115, FUdR, RNAi	23.7±0.3 [84.9%]	0.3699	0.0107143	25.9±0.3 [92.8%]	27.9±0.3	23 [82.1%]	26 [92.9%]	28	31 [79.5%]	35 [89.7%]	39
WT(EV)	-	HT115, FUdR, EV	17.2±0.1 [90.5%]	[for reference]	[for reference]	17.9±0.1 [96.0%]	19.0±0.1	17 [89.5%]	18 [94.7%]	19	20 [83.3%]	21 [87.5%]	24
daf-16	mu86	HT115, FUdR, EV	14.6±0.2 [89%]	[control]	[control]	15.3±0.2 [93.2%]	16.4±0.2	15 [93.8%]	15 [93.8%]	16	19 [86.4%]	20 [90.9%]	22
daf-16;odr-3	mu86; n1605	HT115, FUdR, EV	12.2±0.2 [87.1%]	-0.1643	-0.0213483	13.2±0.2 [94.2%]	14.0±0.2	12 [85.7%]	13 [92.9%]	14	18 [90%]	19 [95%]	20
daf-16;ife-2	mu86; RNAi	HT115, FUdR, RNAi	15.6±0.2 [86.7%]	0.0684	-0.0258427	16.4±0.2 [91.1%]	18.0±0.3	16 [88.9%]	17 [94.4%]	18	20 [87%]	22 [95.7%]	23
daf-16;odr-3;ife-2	mu86; n1605; RNAi	HT115, FUdR, RNAi	14.5±0.2 [90.6%]	-0.0068	0.0179775	15.2±0.2 [95.0%]	16.0±0.3	15 [93.8%]	16 [100%]	16	20 [95.2%]	21 [100%]	21
daf-16;cku-70	mu86; RNAi	HT115, FUdR, RNAi	14.9±0.2 [90.3%]	0.0205	0.0146067	15.6±0.2 [94.5%]	16.5±0.2	15 [88.2%]	16 [94.1%]	17	19 [86.4%]	21 [95.5%]	22
daf-16;odr-3;cku-70	mu86; n1605; RNAi	HT115, FUdR, RNAi	12.4±0.2 [89.2%]	-0.1506	0.00224719	13.1±0.2 [94.2%]	13.9±0.2	13 [100%]	13 [100%]	13	18 [90%]	19 [95%]	20
daf-16;ife-2;cku-70	mu86; RNAi / 2; RNAi /2	HT115, FUdR, RNAi	16.2±0.2 [88%]	0.1095	-0.011236	16.9±0.2 [91.8%]	18.4±0.2	17 [89.5%]	17 [89.5%]	19	20 [87%]	21 [91.3%]	23
daf-16;odr-3;ife-2;cku-70	mu86; n1605; RNAi / 2; RNAi / 2	HT115, FUdR, RNAi	14.9±0.2 [89.2%]	0.0205	0.00224719	15.7±0.2 [94.0%]	16.7±0.2	15 [93.8%]	16 [100%]	16	19 [86.4%]	21 [95.5%]	22
WT	-	OP50, FUdR	15.6±0.3 [78.4%]	[control]	[control]	17.5±0.2 [87.9%]	19.9 ± 0.2	14 [70%]	18 [90%]	20	25 [89.3%]	26 [92.9%]	28
odr-3	n1605	OP50, FUdR	17.8±0.3 [83.2%]	0.141	0.061	19.4±0.3 [90.7%]	21.4 ± 0.3	18 [85.7%]	19 [90.5%]	21	25 [83.3%]	28 [93.3%]	30
ife-2	ok306	OP50, FUdR	17.3±0.3 [83.2%]	0.109	0.061	18.8±0.3 [90.4%]	20.8 ± 0.3	18 [90%]	19 [95%]	20	26 [86.7%]	29 [96.7%]	30
odr-3;ife-2	n1605; ok306	OP50, FUdR	18.5±0.4 [81.9%]	0.186	0.044	20.1±0.4 [88.9%]	22.6 ± 0.4	19 [86.4%]	20 [90.9%]	22	34 [89.5%]	36 [94.7%]	38
daf-16	mu86	OP50, FUdR	12.7±0.2 [80.4%]	[control]	[control]	13.9±0.2 [88%]	15.8 ± 0.2	12 [75%]	14 [87.5%]	16	21 [87.5%]	22 [91.7%]	24
daf-16;odr-3	mu86; n1605	OP50, FUdR	12.6±0.2 [82.9%]	-0.008	0.031	13.7±0.2 [90.1%]	15.2 ± 0.2	12 [80%]	13 [86.7%]	15	20 [90.9%]	21 [95.5%]	22
daf-16;ife-2	mu86; ok306	OP50, FUdR	14.1±0.2 [82.9%]	0.11	0.032	15.2±0.2 [89.4%]	17 ± 0.2	13 [76.5%]	14 [82.4%]	17	20 [76.9%]	22 [84.6%]	26
daf-16;odr-3;ife-2	mu86; n1605; ok306	OP50, FUdR	12±0.2 [78.9%]	-0.055	-0.018	13.2±0.2 [86.8%]	15.2 ± 0.2	12 [75%]	13 [81.2%]	16	20 [87%]	21 [91.3%]	23
WT	-	OP50, no FUdR	20.7±0.3 [84.8%]	[control]	[control]	22.5±0.3 [92.2%]	24.4 ± 0.3	21 [84%]	23 [92%]	25	31 [91.2%]	33 [97.1%]	34
odr-3	n1605	OP50, no FUdR	21.4±0.3 [81.1%]	0.034	-0.045	24.2±0.4 [91.7%]	26.4 ± 0.4	21 [80.8%]	25 [96.2%]	26	33 [80.5%]	40 [97.6%]	41
ife-2	ok306	OP50, no FUdR	22.4±0.3 [84.5%]	0.082	-0.004	24.7±0.4 [93.2%]	26.5 ± 0.3	23 [85.2%]	25 [92.6%]	27	33 [86.8%]	36 [94.7%]	38
odr-3;ife-2	n1605; ok306	OP50, no FUdR	23.4±0.3 [83.9%]	0.13	-0.011	25.8±0.4 [92.5%]	27.9 ± 0.4	24 [85.7%]	26 [92.9%]	28	33 [82.5%]	37 [92.5%]	40
* RNAi / 2 represents a 1:1 density mixture of ife-2 or cku-70 RNAi clone and HT115 (EV) bacteria
** Values computed considering the transition events from a healthy or impaired state to the frail state
